# Supplementary material for: All-brush-painted top-gate organic thin-film transistors
Source: Royal Society of Chemistry journal article supplement (doi:10.1039/c3tc30357h), 2013-01-01
Supplement: c3tc30357h.pdf [file c3tc30357h.pdf]

## Supporting Information for

### All-brush-painted top-gate organic thin-film transistors

Zhe Qi,<sup>a,b</sup> Fengjiao Zhang,<sup>a,b</sup> Chong-an Di,<sup>\*a</sup> Jizheng Wang<sup>\*a</sup> and Daoben Zhu<sup>a</sup>

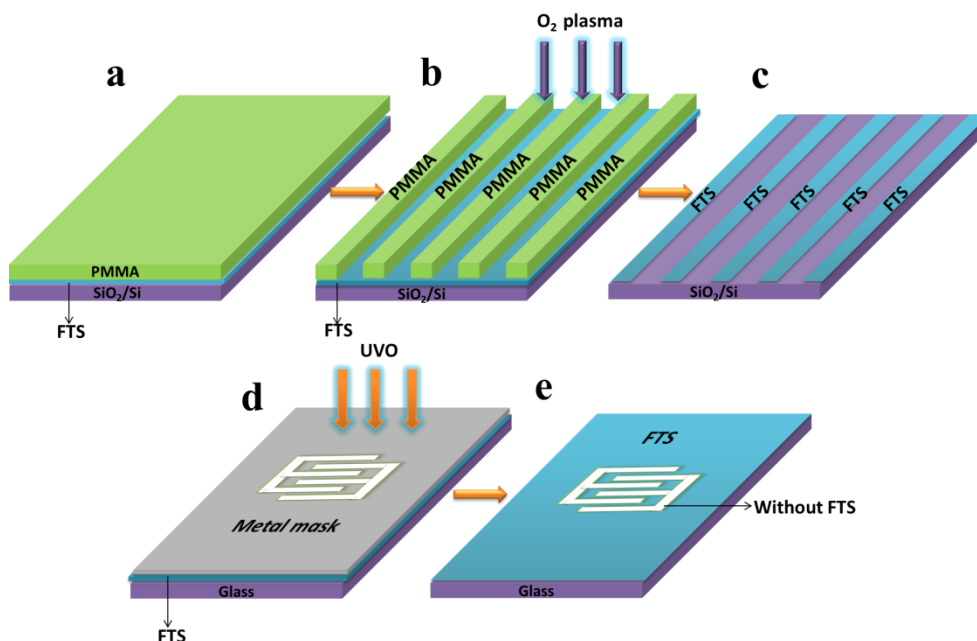

**Fig. S1** Schematic of FTS patterning process by using a-c) PMMA film and d-e) metal mask as the pattern model. a) Deposition of PMMA layer on FTS modified substrate, b) patterning PMMA followed by the O<sub>2</sub> plasma treatment and c) SiO<sub>2</sub>/Si substrate with patterned FTS. d) Covering metal mask on the FTS modified substrate followed by the UVO treatment and e) glass substrate with patterned FTS.

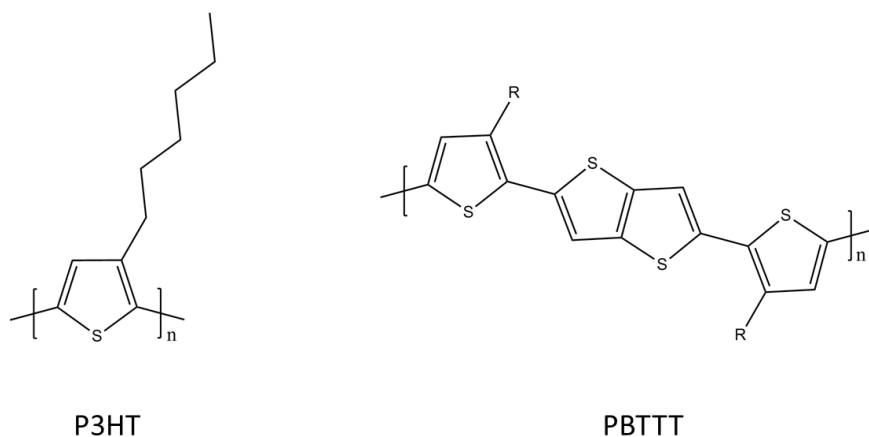

**Fig. S2** Chemical structure of poly(3-hexylthiophene) (P3HT) and poly(2,5-bis(3-alkylthiophen-2-yl)thieno[3,2-*b*]thiophene) (PBTTT).

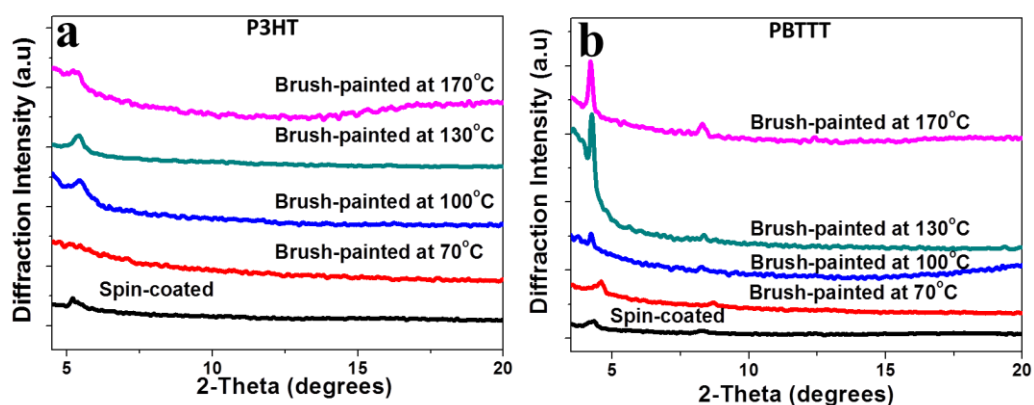

**Fig. S3** The XRD spectra of thin film based on P3HT and PBTTT, prepared by spin coating and brush painting at different temperatures and followed by annealing treatment at 100 °C for P3HT and 170 °C for PBTTT.

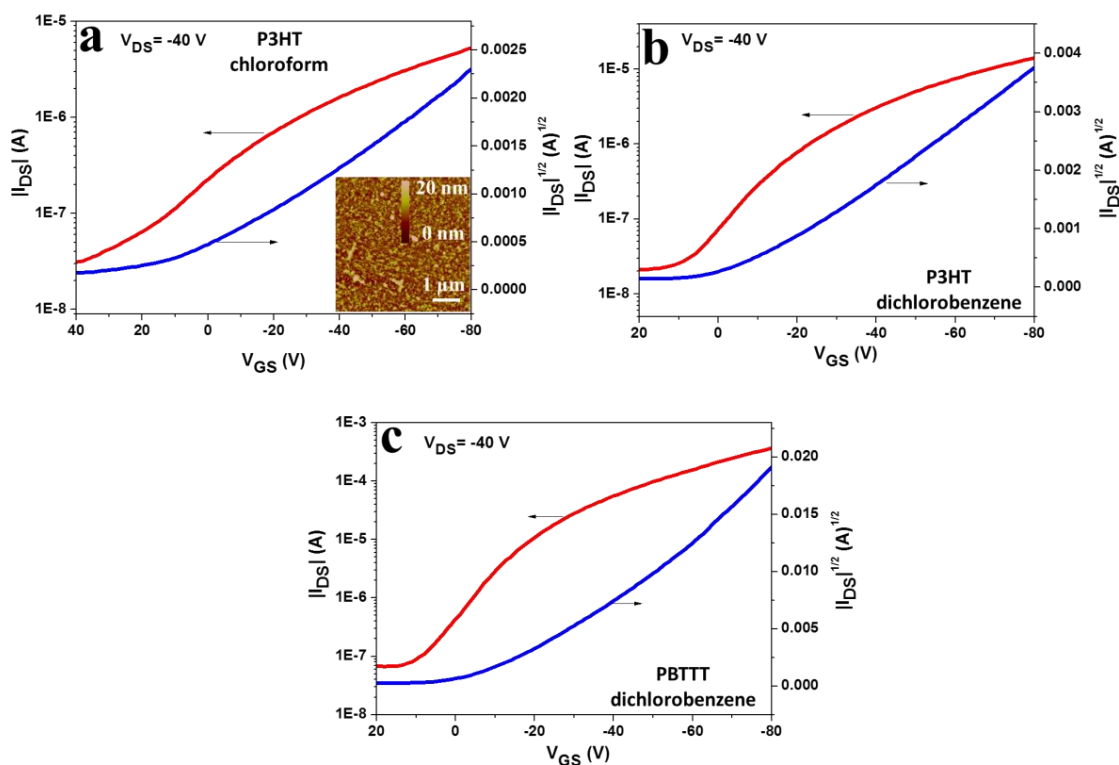

**Fig. S4** Transfer characteristics of OTFTs with brush painted a) P3HT dissolved in chloroform, b) in chlorobenzene and c) PBTTT dissolved in dichlorobenzene utilizing pre-patterned Au as source-drain electrodes, spin-coated PMMA as dielectric film, and evaporated silver as gate electrode. (a:  $W=2800 \mu\text{m}$ ,  $L=30 \mu\text{m}$ ; b:  $W=2800 \mu\text{m}$ ,  $L=40 \mu\text{m}$ ; c:  $W=2800 \mu\text{m}$ ,  $L=10 \mu\text{m}$ )

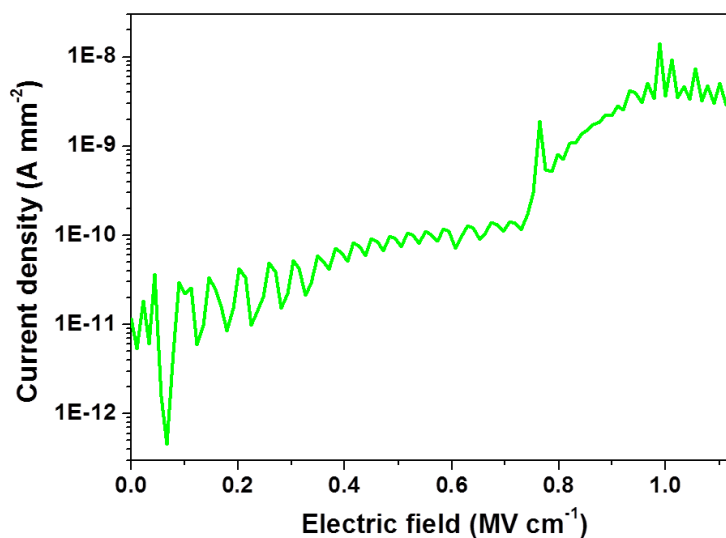

**Fig. S5** Leak current test of two-terminal device with structure of ITO/PMMA/Ag.

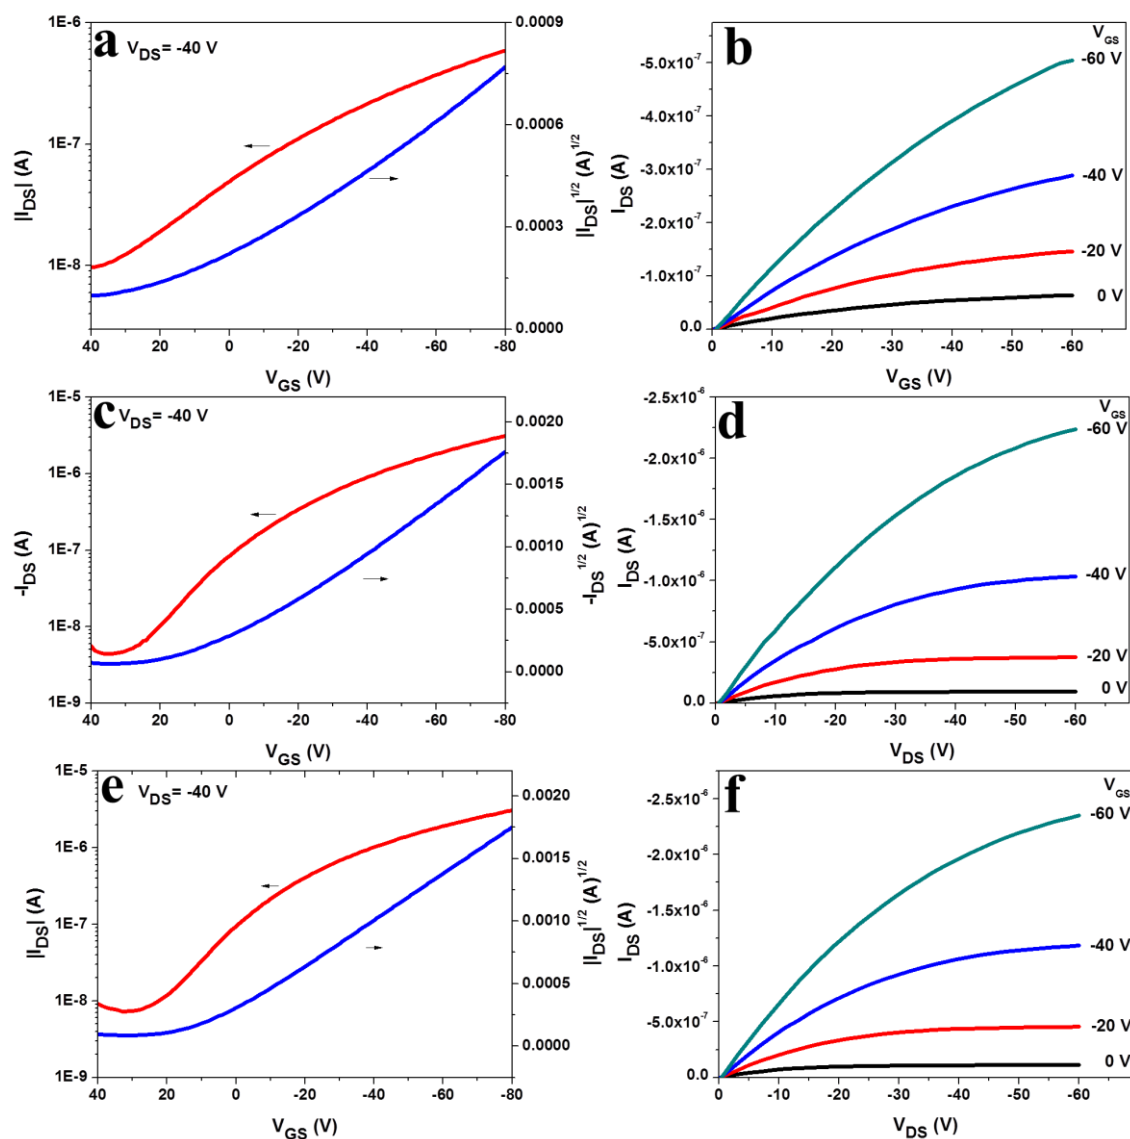

**Fig. S6** Transfer and output characteristics of P3HT based all-brush-painted devices at different substrate temperatures of a-b) 70 °C, c-d) 100 °C, and e-f) 170 °C. ( $W=4200$   $\mu\text{m}$ ,  $L=100$   $\mu\text{m}$ )

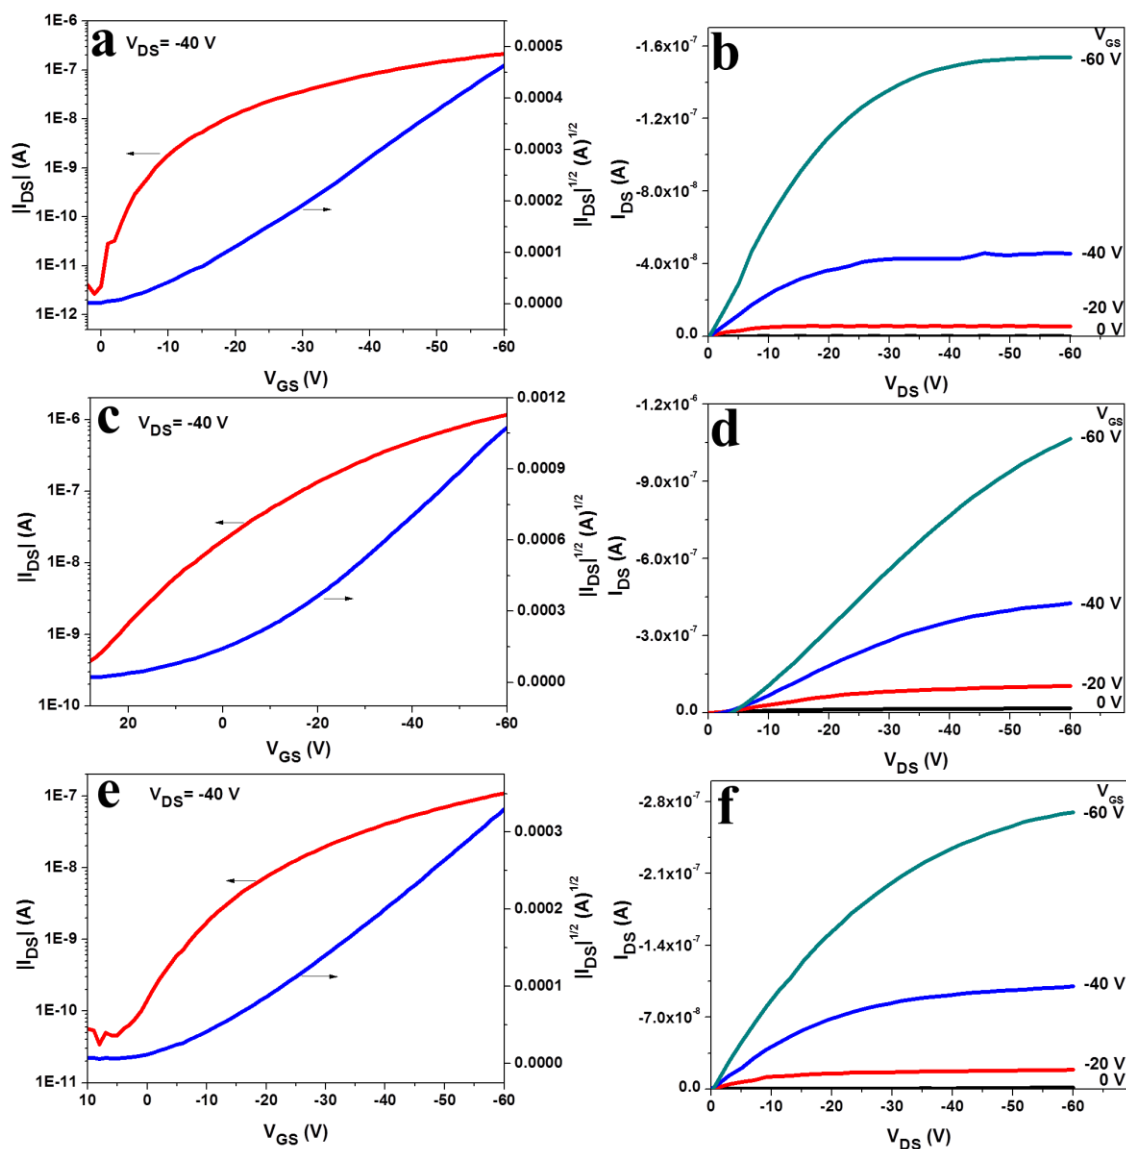

**Fig. S7** Transfer and output characteristics of PBTtT based all-brush-painted devices at different substrate temperatures of a-b) 70 °C, c-d) 100 °C, and e-f) 170 °C.(a,b:  $W=2800 \mu\text{m}$ ,  $L=80 \mu\text{m}$ ; c,d:  $W=1800 \mu\text{m}$ ,  $L=100 \mu\text{m}$ ; e,f:  $W=2000 \mu\text{m}$ ,  $L=60 \mu\text{m}$  )

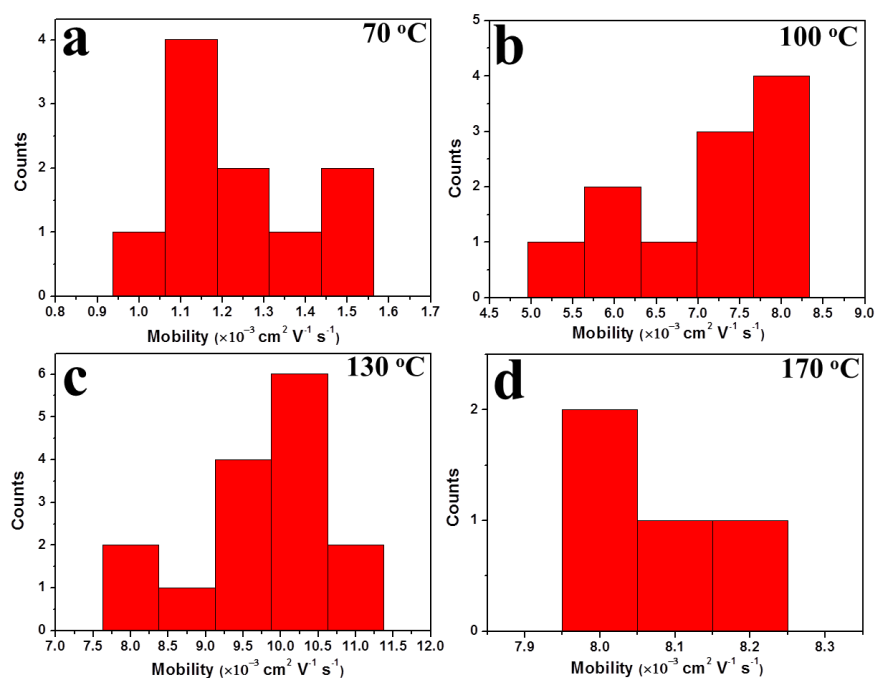

**Fig. S8** Statistical histograms of field-effect mobility for P3HT based OTFTs brush painted at a) 70 °C, b) 100 °C, c) 130 °C and d) 170 °C.

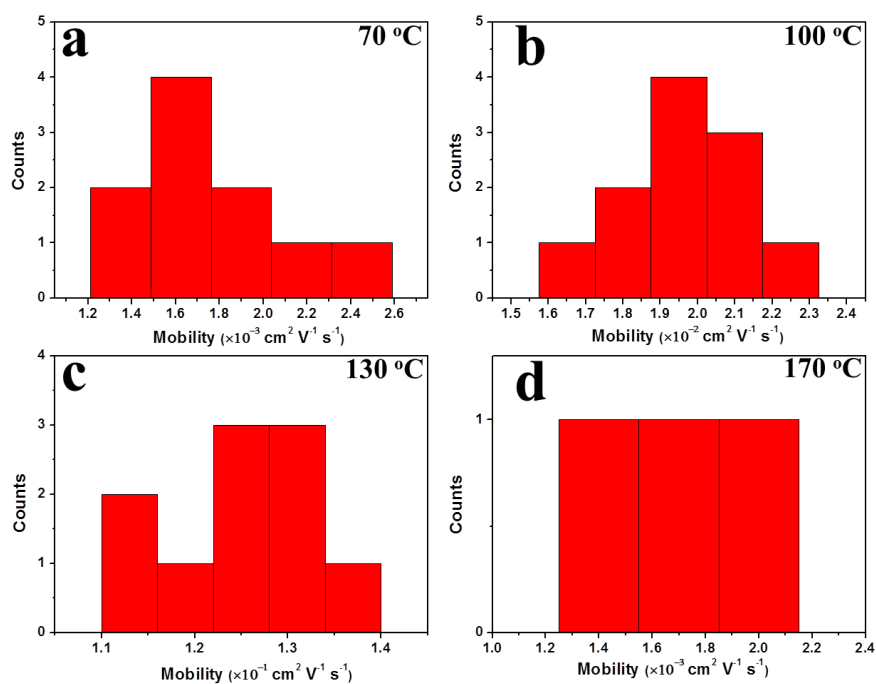

**Fig. S9** Statistical histograms of field-effect mobility for PBTTT based OTFTs brush painted at a) 70 °C, b) 100 °C, c) 130 °C and d) 170 °C.

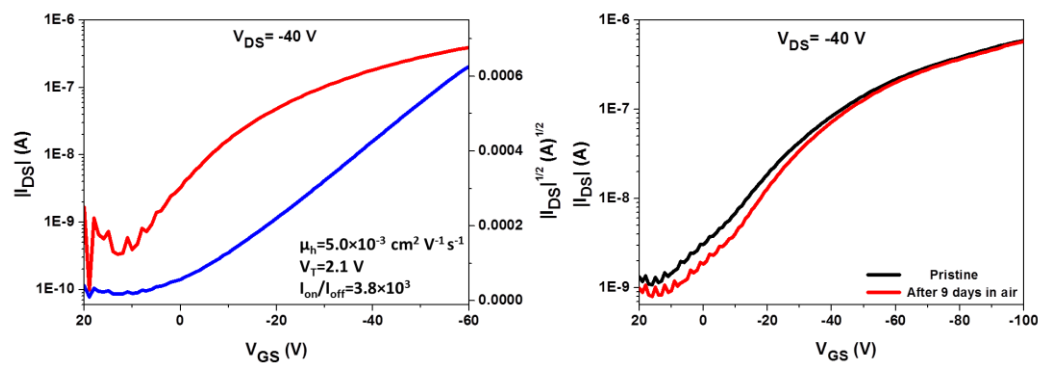

**Fig. S10** a) Transfer characteristics of P3HT based devices with all functional layers deposited by brush painting in ambient conditions. b) Transfer curve of a P3HT based device before (black) and after (red) storage for 9 days in air. (a:  $W=3000 \mu\text{m}$ ,  $L=140 \mu\text{m}$ )
